# Supplementary material
Source: PubMed Central journal article supplement (PMC1955799)
Supplement: pnas_0706404104_6.pdf [file pnas_0706404104_6.pdf]

**Table 2. Binding parameters of GIP and GLP-1 variants**

| Peptide                         | $K_d$<br>( $\mu\text{M}$ ) |      | Stoichiometry | $\Delta H$<br>( $\text{kJ mol}^{-1}$ ) | $-\Delta\Delta H^*$<br>( $\text{kJ mol}^{-1}$ ) | $-T\Delta S^{**}$<br>( $\text{kJ mol}^{-1}$ ) | $-T\Delta\Delta S^{a,b}$<br>( $\text{kJ mol}^{-1}$ ) |
|---------------------------------|----------------------------|------|---------------|----------------------------------------|-------------------------------------------------|-----------------------------------------------|------------------------------------------------------|
| GIP <sub>1-42</sub>             | 1.1 ± 0.1                  | 0.1  | 1.0 ± 0.1     | -92.7 ± 0.4                            | -                                               | 59.2 ± 1.2                                    | -                                                    |
| GIP <sub>1-42</sub> D15A        | 1.4 ± 0.1                  | 0.1  | 1.1 ± 0.1     | -83.8 ± 0.4                            | 8.9                                             | 50.9 ± 1.7                                    | 8.3                                                  |
| GIP <sub>1-42</sub> Q19A        | 1.5 ± 0.2                  | 0.2  | 1.0 ± 0.1     | -85.4 ± 1.3                            | 7.3                                             | 52.6 ± 5.8                                    | 6.6                                                  |
| GIP <sub>1-42</sub> Q20A        | 2.2 ± 0.1                  | 0.1  | 1.0 ± 0.1     | -79.0 ± 0.3                            | 13.7                                            | 47.2 ± 1.9                                    | 12.0                                                 |
| GIP <sub>1-42</sub> F22A        | 210.5 ± 21.6               | 21.6 | 1.3 ± 0.1     | -73.6 ± 11.3                           | 19.1                                            | 53.0 ± 13.4                                   | 6.2                                                  |
| GIP <sub>1-42</sub> V23A        | 139.1 ± 10.0               | 10.0 | 0.6 ± 0.1     | -58.6 ± 10.4                           | 34.1                                            | 36.9 ± 11.9                                   | 22.3                                                 |
| GIP <sub>1-42</sub> L26A        | 5.5 ± 0.2                  | 0.2  | 1.1 ± 0.1     | -97.6 ± 1.2                            | -4.9                                            | 68.1 ± 2.3                                    | -8.9                                                 |
| GIP <sub>1-42</sub> L27A        | 104.7 ± 3.6                | 3.6  | 1.1 ± 0.1     | -58.7 ± 2.3                            | 34.0                                            | 36.3 ± 3.1                                    | 22.9                                                 |
| GIP <sub>1-42</sub> K30A        | 0.7 ± 0.1                  | 0.1  | 1.1 ± 0.1     | -86.4 ± 0.2                            | 6.3                                             | 51.9 ± 5.1                                    | 7.3                                                  |
| GIP <sub>13-42</sub>            | 6.8 ± 0.2                  | 0.2  | 1.1 ± 0.1     | -77.3 ± 0.6                            | 15.4                                            | 48.2 ± 1.7                                    | 11.0                                                 |
| GIP <sub>15-42</sub>            | 11.9 ± 0.5                 | 0.5  | 1.1 ± 0.1     | -78.7 ± 1.1                            | 14.0                                            | 51.0 ± 2.4                                    | 8.2                                                  |
| GIP <sub>17-42</sub>            | 15.2 ± 0.5                 | 0.5  | 1.1 ± 0.1     | -67.6 ± 0.7                            | 25.1                                            | 40.5 ± 1.5                                    | 18.7                                                 |
| GIP <sub>19-42</sub>            | 34.5 ± 0.9                 | 0.9  | 1.1 ± 0.1     | -58.7 ± 0.8                            | 34.0                                            | 33.6 ± 1.4                                    | 25.6                                                 |
| GIP <sub>21-42</sub>            | 105.6 ± 4.8                | 4.8  | 0.9 ± 0.1     | -52.3 ± 3.7                            | 40.4                                            | 29.9 ± 4.7                                    | 29.3                                                 |
| GIP <sub>23-42</sub>            | n.d.                       |      | n.d.          | n.d.                                   | -                                               | n.d.                                          | -                                                    |
| GIP <sub>1-42</sub> + 9% MCD*** | 5.4 ± 0.1                  | 0.1  | 1.1 ± 0.1     | -109.4 ± 0.2                           | -16.7                                           | 79.7 ± 0.5                                    | -20.5                                                |
| GLP-1 <sub>7-36</sub>           | 13.5 ± 0.8                 | 0.8  | 1.2 ± 0.1     | -39.5 ± 0.8                            | 53.2                                            | 12.1 ± 2.3                                    | 47.1                                                 |
| GLP-1 <sub>7-36</sub> E15D      | 18.2 ± 0.8                 | 0.8  | 1.4 ± 0.1     | -45.7 ± 0.5                            | 47.0                                            | 19.0 ± 1.6                                    | 40.2                                                 |
| GLP-1 <sub>7-36</sub> A19Q      | 24.1 ± 1.1                 | 1.1  | 1.2 ± 0.1     | -39.0 ± 0.7                            | 53.7                                            | 13.1 ± 1.9                                    | 46.1                                                 |
| GLP-1 <sub>7-36</sub> E15D/A19Q | 19.9 ± 0.8                 | 0.8  | 1.3 ± 0.1     | -48.9 ± 0.7                            | 43.8                                            | 22.4 ± 1.8                                    | 36.8                                                 |
| GLP-1 <sub>7-36</sub> K20Q      | 12.0 ± 0.7                 | 0.7  | 1.3 ± 0.1     | -38.9 ± 0.9                            | 53.8                                            | 11.3 ± 2.5                                    | 47.9                                                 |

Errors correspond to standard deviation of non-linear least-squares fit of the data points in the titration curve. n.d., not determined.

\* Relative to binding of GIP<sub>1-42</sub>.

\*\* T = 293 K.

\*\*\* 9% Methyl- $\beta$ -Cyclodextrin being present in titrand (GIP<sub>1-42</sub>) and analyte (GIPR ECD) solution.
