# Supplementary material
Source: PubMed Central journal article supplement (PMC1955799)
Supplement: pnas_0706404104_7.pdf [file pnas_0706404104_7.pdf]

**Table 3. Binding parameters of GIP<sub>1-42</sub> at different temperatures**

| Temperature (K) | $K_d$<br>( $\mu\text{M}$ ) | Stoichiometry<br>$n$ | $\Delta H$<br>( $\text{kJ mol}^{-1}$ ) | $-T\Delta S$<br>( $\text{kJ mol}^{-1}$ ) | $\Delta G$<br>( $\text{kJ mol}^{-1}$ ) |
|-----------------|----------------------------|----------------------|----------------------------------------|------------------------------------------|----------------------------------------|
| 283.3           | $0.3 \pm 0.1$              | $1.0 \pm 0.1$        | $-82.5 \pm 0.6$                        | $-47.3 \pm 3.6$                          | $-35.1 \pm 3.0$                        |
| 288.3           | $0.6 \pm 0.1$              | $1.0 \pm 0.1$        | $-88.1 \pm 0.5$                        | $-53.8 \pm 2.3$                          | $-34.2 \pm 1.8$                        |
| 293.2           | $1.1 \pm 0.1$              | $1.0 \pm 0.1$        | $-92.7 \pm 0.4$                        | $-59.2 \pm 1.5$                          | $-33.5 \pm 1.1$                        |
| 298.2           | $2.2 \pm 0.1$              | $1.0 \pm 0.1$        | $-96.3 \pm 0.2$                        | $-63.9 \pm 0.7$                          | $-32.3 \pm 0.5$                        |
| 303.2           | $4.1 \pm 0.1$              | $1.0 \pm 0.1$        | $-104.8 \pm 0.3$                       | $-73.5 \pm 0.7$                          | $-31.3 \pm 0.4$                        |

Errors correspond to standard deviation of the nonlinear least-squares fit of the data points in the titration curve.
