# Supplementary material
Source: PubMed Central journal article supplement (PMC1955799)
Supplement: pnas_0706404104_8.pdf [file pnas_0706404104_8.pdf]

**Table 4. Comparison of changes in solvent-accessible surfaces**

|                                                     | Crystal structure*** | Binding analysis**** |
|-----------------------------------------------------|----------------------|----------------------|
| $\Delta C_p$ (J mol <sup>-1</sup> K <sup>-1</sup> ) | -1,221               | <b>-1,066 ± 87</b>   |
| $\Delta H(333K)$ (kJ mol <sup>-1</sup> )            | -20.4                | <b>-1,35.3 ± 11</b>  |
| $\Delta ASA_{apolar}$ (Å <sup>2</sup> )             | <b>-877</b>          | -1,381 ± 114         |
| $\Delta ASA_{polar}$ (Å <sup>2</sup> )              | <b>-392</b>          | -1,404 ± 112         |
| $\Delta ASA_{total}$ (Å <sup>2</sup> )              | <b>-1,269</b>        | -2,785 ± 226         |

\* Bold numbers represent experimentally determined values.

\*\*Change of solvent-accessible surface of GIPR ECD-GIP complex calculated from the crystal structure of the complex and the same structures of GIP and GIPR ECD, separately, using the program AREAIMOL from CCP4 software package (probe radius 1.4 Å (1)).  $\Delta C_p$  calculated according to equation 1,  $\Delta H$  at 333K calculated according to equation 2.

\*\*\*Changes in solvent-accessible surfaces calculated according to equations 1 and 2 and experimentally determined  $\Delta C_p$  and  $\Delta H$  extrapolated to 333K.

$$\Delta C_p = 1.88 \Delta ASA_{apolar} - 1.09 \Delta ASA_{polar} \quad [1]$$

$$\Delta H(333K) = -35.3 \Delta ASA_{apolar} + 131 \Delta ASA_{polar} \quad [2]$$

1. Collaborative Computational Project Number 4 (1994) *Acta Crystallogr D Biol Crystallogr* 50:760–763.
