# Supplementary material
Source: PubMed Central journal article supplement (PMC1955799)
Supplement: pnas_0706404104_9.pdf [file pnas_0706404104_9.pdf]

**Table 5. Solvent-accessible surfaces for  $\alpha$ -helical transition of GIP<sub>6-28</sub>**

|        | ASA<br>GIP <sub>6-28</sub> extended* | ASA<br>GIP <sub>6-28</sub> $\alpha$ -<br>helical** | $\Delta$ ASA<br>GIP <sub>6-28</sub> *** | $\Delta\Delta$ ASA<br>ITC/structure**** |
|--------|--------------------------------------|----------------------------------------------------|-----------------------------------------|-----------------------------------------|
| Apolar | 1,897                                | 1585                                               | -312                                    | -504 $\pm$ 114                          |
| Polar  | 1,616                                | 833                                                | -783                                    | -1012 $\pm$ 112                         |
| Total  | 3,513                                | 2418                                               | -1095                                   | -1516 $\pm$ 226                         |

Solvent accessible surfaces (ASA) were calculated using the program AREAIMOL from CCP4 software package (probe radius 1.4 Å).

\*GIP residues 6-28 in hypothetical extended conformation (dihedral angles according to anti-parallel  $\beta$ -sheet).

\*\*GIP residues 6-28 as seen in the crystal structure of the complex.

\*\*\* $\Delta$ ASA calculated from hypothetical transition between extended and helical conformation of GIP<sub>6-28</sub>.

\*\*\*\* $\Delta\Delta$ ASA between structure-derived and calorimetry-derived  $\Delta$ ASA values (SI Table 4).
