# Supplementary material
Source: PubMed Central journal article supplement (PMC1955799)
Supplement: pnas_0706404104_10.pdf [file pnas_0706404104_10.pdf]

**Table 6. Deconvolution of far-UV CD analysis of binding**

|                 | Calculated secondary structure content* |           |           | Crystal structure (complex)** |
|-----------------|-----------------------------------------|-----------|-----------|-------------------------------|
|                 | GIP                                     | GIPR ECD  | Complex   |                               |
| $\alpha$ -helix | 25 % (11)                               | 18 % (25) | 21 % (38) | 29 % (51)                     |
| $\beta$ -strand | 13 % (5)                                | 15 % (20) | 14 % (24) | 9 % (16)                      |
| Turn            | 14 % (6)                                | 16 % (21) | 15 % (27) | 18 % (32)                     |
| Other/unordered | 47 % (20)                               | 53 % (71) | 48 % (86) | 44 % (78)                     |

\*Values were calculated using CDPro software package with SP37A reference set (1).

The corresponding numbers of residues are given in parenthesis.

\*\*Secondary structure content as seen in the crystal structure of the complex. The corresponding numbers of residues are given in parenthesis.

1. Sreerama N, Woody RW (2000) *Anal Biochem* 287: 252–260.
