# Supplementary material
Source: PubMed Central journal article supplement (PMC1955799)

**(a)**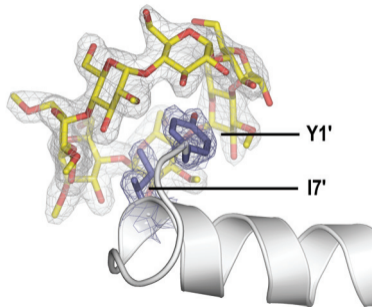**(b)**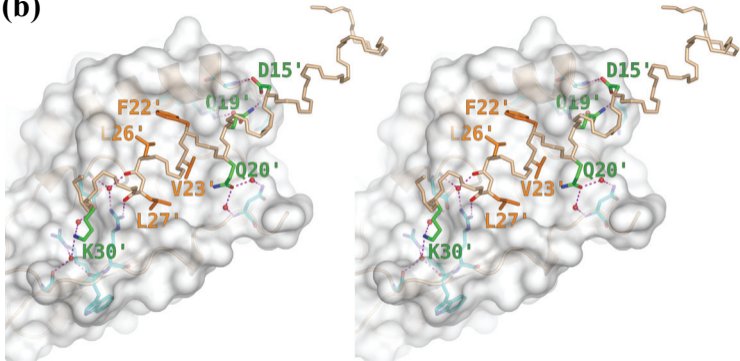

Supplement: pnas_0706404104_1.pdf [file pnas_0706404104_1.pdf]

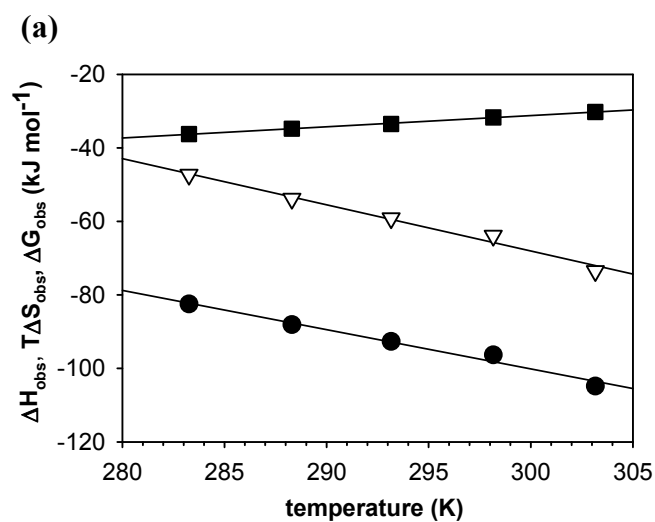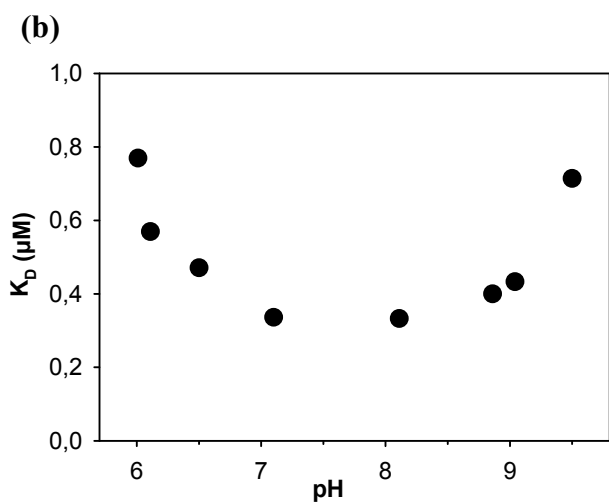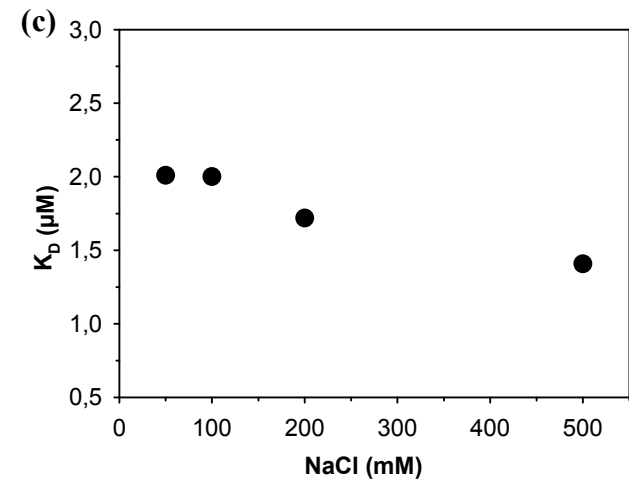

Supplement: pnas_0706404104_2.pdf [file pnas_0706404104_2.pdf]

**(a)**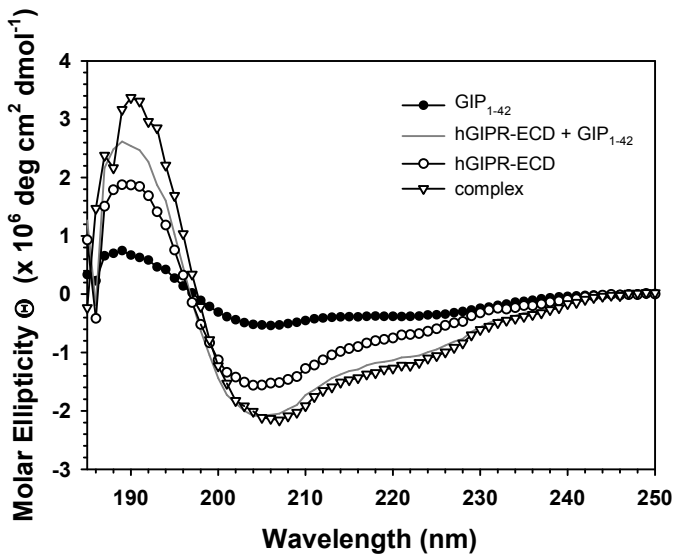**(b)**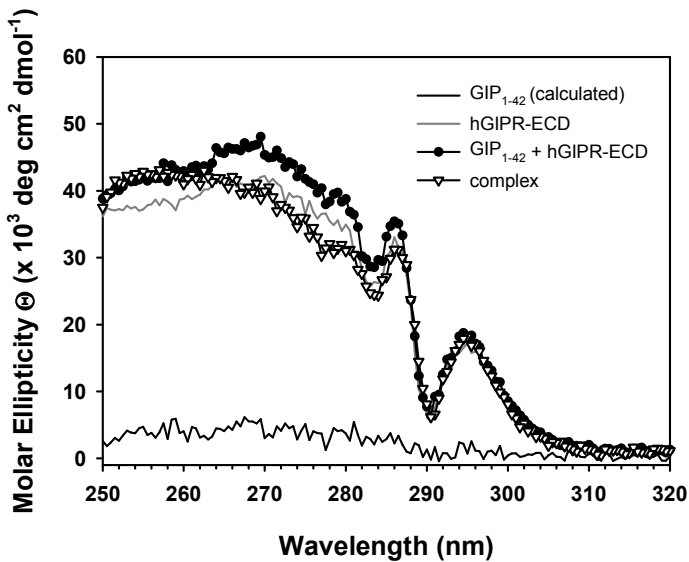

Supplement: pnas_0706404104_3.pdf [file pnas_0706404104_3.pdf]

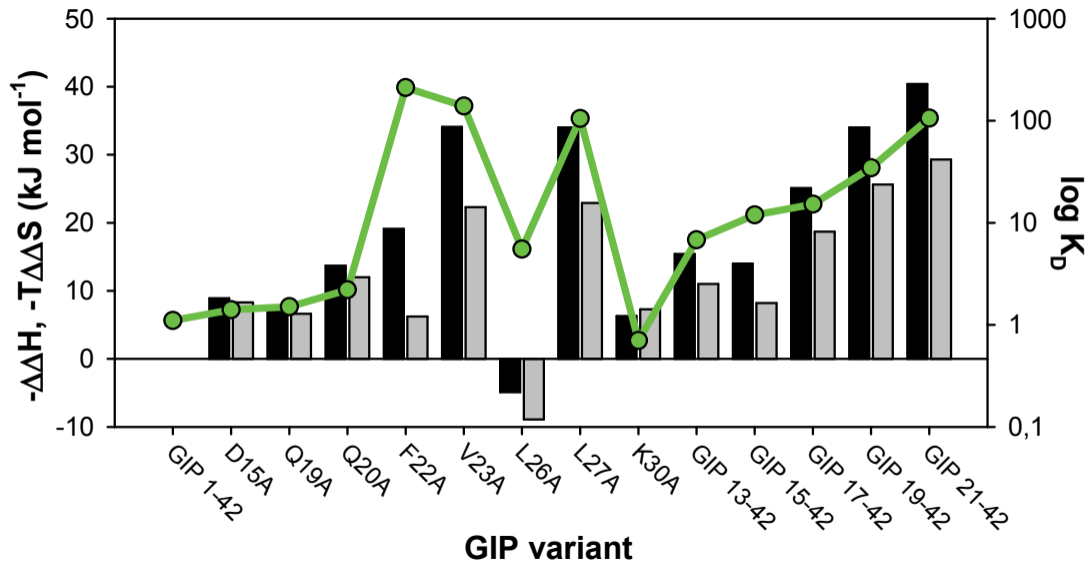

Supplement: pnas_0706404104_4.pdf [file pnas_0706404104_4.pdf]

**(a)**

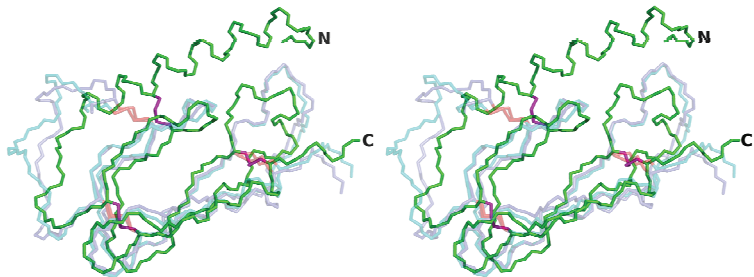

**(b)**

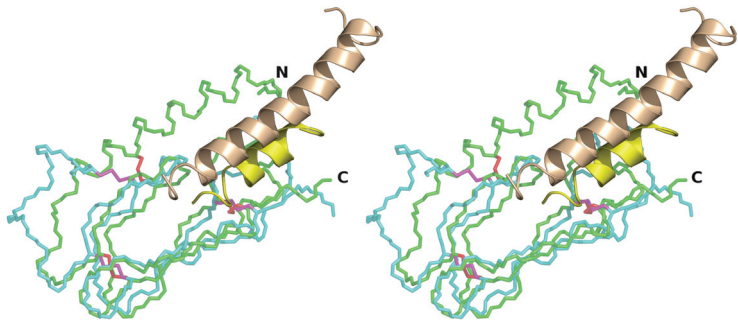

Supplement: pnas_0706404104_5.pdf [file pnas_0706404104_5.pdf]
